# Supplementary material
Source: PubMed Central journal article supplement (PMC420137)
Supplement: eukcell_3_3_735__1.pdf [file eukcell_3_3_735__1.pdf]

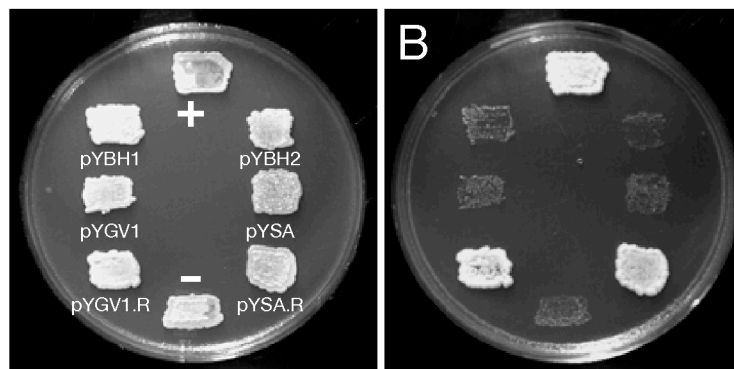

**Supplemental Figure.** Demonstration that lethal effects of RPB1 genes with mutated CTDs are due to the CTD substitutions and not incidental mutations that could have occurred elsewhere in the gene during cloning and transformation. **(A)** Four yeast CTD mutants, chosen in a haphazard manner from among inviable mutants, along with two “reversion mutants” (pYGV1.R and pYSA.R) in which the yeast WT CTD heptads were reinserted in place of the mutated sequences. Cells are plated on SC –Leu –Ura medium. The positive and negative controls are the same as described in the main text and figures. **(B)** Replica plating onto SC –Leu +5-FOA medium to select for cells that contain only the mutated RPB1 gene. Growth of reversion mutants is comparable to the positive control, indicating that our RPB1 constructs retain functionality outside the mutated CTD regions.
